# Supplementary material
Source: MDPI journal article supplement (https://www.mdpi.com/2410-3896/8/3/58)
Supplement: s1 [file s1]

Table S1. Standard thermodynamic characteristics of monomer formation for 2-monoacyl-*sn*-glycerols

| The number of carbon atoms in $C_nH_{2n+1}COO$ substituent | Enthalpy of formation $\Delta H_{298,mon}^0$ , kJ/mol | Absolute entropy of formation $S_{298,mon}^0$ , J/(mol·K) | Gibbs energy of formation $\Delta G_{298,mon}^0$ , kJ/mol |
|------------------------------------------------------------|-------------------------------------------------------|-----------------------------------------------------------|-----------------------------------------------------------|
| $n=6$                                                      | -877.28                                               | 595.77 (635.97)*                                          | -526.56 (-538.54)*                                        |
| $n=7$                                                      | -899.98                                               | 626.83 (673.73)                                           | -517.91 (-531.89)                                         |
| $n=8$                                                      | -922.64                                               | 660.10 (713.70)                                           | -509.88 (-525.85)                                         |
| $n=9$                                                      | -945.32                                               | 689.39 (749.69)                                           | -500.68 (-518.65)                                         |
| $n=10$                                                     | -967.96                                               | 723.52 (790.52)                                           | -492.89 (-512.85)                                         |
| $n=11$                                                     | -990.60                                               | 753.22 (826.92)                                           | -483.78 (-505.74)                                         |
| $n=12$                                                     | -1013.35                                              | 785.83 (866.23)                                           | -475.63 (-499.59)                                         |
| $n=13$                                                     | -1036.01                                              | 813.04 (900.14)                                           | -465.80 (-491.76)                                         |
| $n=14$                                                     | -1058.69                                              | 844.98 (938.78)                                           | -457.40 (-485.35)                                         |
| $n=15$                                                     | -1081.27                                              | 875.87 (976.37)                                           | -448.57 (-478.52)                                         |
| $n=16$                                                     | -1103.87                                              | 913.84 (1021.04)                                          | -441.88 (-473.83)                                         |
| $n=17$                                                     | -1126.75                                              | 939.63 (1053.53)                                          | -431.84 (-465.78)                                         |

\*Data in parentheses corresponds to corrected values of the absolute entropy and Gibbs energy of formation with account for the free rotation term of the methylene units of the hydrophobic chain

Table S2. Clusterization thermodynamic parameters of formation for small associates of 2-monoacyl-*sn*-glycerol in the approximation of PM3 method calculated at 298 K

| The number of carbon atoms in $C_nH_{2n+1}COO$ substituent | $\Delta H_{298,m}^{Cl}$ , kJ/mol | $\Delta S_{298,m}^{Cl}$ , J/(mol·K) | $\Delta G_{298,m}^{Cl}$ , kJ/mol | The number of carbon atoms in $C_nH_{2n+1}COO$ substituent | $\Delta H_{298,m}^{Cl}$ , kJ/mol | $\Delta S_{298,m}^{Cl}$ , J/(mol·K) | $\Delta G_{298,m}^{Cl}$ , kJ/mol |
|------------------------------------------------------------|----------------------------------|-------------------------------------|----------------------------------|------------------------------------------------------------|----------------------------------|-------------------------------------|----------------------------------|
| Dimer, p                                                   |                                  |                                     |                                  |                                                            |                                  |                                     |                                  |
| $n=6$                                                      | -38.72                           | -210.62                             | 24.04                            | $n=12$                                                     | -60.04                           | -282.48                             | 24.13                            |
| $n=7$                                                      | -36.75                           | -217.98                             | 28.21                            | $n=13$                                                     | -67.91                           | -290.50                             | 18.66                            |
| $n=8$                                                      | -39.49                           | -235.46                             | 30.68                            | $n=14$                                                     | -70.46                           | -303.49                             | 19.98                            |
| $n=9$                                                      | -47.09                           | -243.45                             | 25.46                            | $n=15$                                                     | -78.50                           | -318.31                             | 16.36                            |
| $n=10$                                                     | -49.74                           | -257.95                             | 27.13                            | $n=16$                                                     | -81.22                           | -341.00                             | 20.40                            |
| $n=11$                                                     | -57.59                           | -271.00                             | 23.16                            | $n=17$                                                     | -88.65                           | -346.03                             | 14.46                            |
| Dimer, s                                                   |                                  |                                     |                                  |                                                            |                                  |                                     |                                  |
| $n=6$                                                      | -38.72                           | -210.62                             | 24.04                            | $n=12$                                                     | -69.77                           | -288.51                             | 16.21                            |
| $n=7$                                                      | -40.10                           | -212.55                             | 23.24                            | $n=13$                                                     | -71.21                           | -284.61                             | 13.60                            |
| $n=8$                                                      | -49.02                           | -239.86                             | 22.46                            | $n=14$                                                     | -80.19                           | -307.21                             | 11.35                            |
| $n=9$                                                      | -50.40                           | -238.40                             | 20.64                            | $n=15$                                                     | -81.82                           | -311.74                             | 11.08                            |
| $n=10$                                                     | -59.45                           | -264.80                             | 19.46                            | $n=16$                                                     | -90.96                           | -343.64                             | 11.45                            |
| $n=11$                                                     | -60.93                           | -264.38                             | 17.86                            | $n=17$                                                     | -91.97                           | -336.65                             | 8.35                             |

| Tetramer   |         |          |        |        |         |          |        |
|------------|---------|----------|--------|--------|---------|----------|--------|
| $n=6$      | -130.90 | -744.36  | 90.92  | $n=12$ | -251.29 | -978.56  | 40.32  |
| $n=7$      | -147.66 | -777.52  | 84.04  | $n=13$ | -269.66 | -1059.36 | 46.03  |
| $n=8$      | -170.36 | -832.15  | 77.62  | $n=14$ | -292.81 | -1106.96 | 37.06  |
| $n=9$      | -187.28 | -839.95  | 63.02  | $n=15$ | -311.54 | -1143.65 | 29.27  |
| $n=10$     | -210.62 | -917.88  | 62.91  | $n=16$ | -335.18 | -1222.42 | 29.10  |
| $n=11$     | -228.12 | -924.36  | 47.34  | $n=17$ | -352.82 | -1234.87 | 15.17  |
| Hexamer, p |         |          |        |        |         |          |        |
| $n=6$      | -228.44 | -1276.37 | 151.92 | $n=12$ | -436.47 | -1804.75 | 101.34 |
| $n=7$      | -257.24 | -1334.15 | 140.34 | $n=13$ | -466.88 | -1776.07 | 62.39  |
| $n=8$      | -295.38 | -1478.23 | 145.13 | $n=14$ | -509.38 | -1865.46 | 46.53  |
| $n=9$      | -324.11 | -1523.68 | 129.95 | $n=15$ | -540.57 | -1923.10 | 32.51  |
| $n=10$     | -366.43 | -1627.66 | 118.62 | $n=16$ | -583.53 | -2047.37 | 26.59  |
| $n=11$     | -394.34 | -1645.36 | 95.98  | $n=17$ | -613.04 | -2078.97 | 6.49   |
| Octamer    |         |          |        |        |         |          |        |
| $n=6$      | -318.51 | -1875.04 | 240.26 | $n=9$  | -457.58 | -2158.96 | 185.79 |
| $n=7$      | -359.53 | -1963.41 | 225.57 | $n=10$ | -521.71 | -2325.48 | 171.29 |
| $n=8$      | -423.66 | -2041.14 | 184.60 | $n=11$ | -557.73 | -2321.12 | 133.96 |
